# Supplementary material for: Controlling the aggregation of sodium dodecylsulphate in aqueous poly(ethylene glycol) solutions
Source: Royal Society of Chemistry journal article supplement (doi:10.1039/c5ra13096d), 2015-01-01
Supplement: c5ra13096d1.pdf [file c5ra13096d1.pdf]

## Supplementary Material

### Controlling aggregation of sodium dodecylsulphate in aqueous poly (ethylene glycol) solutions.

J. Dey, <sup>†\*</sup> N.Sultana, <sup>†</sup> S. Kumar, <sup>‡</sup> V.K.Aswal, <sup>‡</sup> S. Choudhury, <sup>§</sup> and K.Ismail<sup>†\*</sup>

<sup>†</sup> Department of Chemistry, North-Eastern Hill University, Shillong – 793022, India

<sup>‡</sup> Solid State Physics Division, Bhabha Atomic Research Center, Trombay, Mumbai – 400085, India

<sup>§</sup> Chemistry Division, Bhabha Atomic Research Center, Trombay, Mumbai – 400085, India

**Address for Manuscript Correspondence:** Prof. K. Ismail, Department of Chemistry, North-Eastern Hill University, NEHU Campus, Shillong - 793022, India. E-mail: [kismail@nehu.ac.in](mailto:kismail@nehu.ac.in); [kinehu@hotmail.com](mailto:kinehu@hotmail.com), Telephone: 91-364 – 2722610, Fax: 91-364 – 2550486 and

Jahar Dey

Department of Chemistry, North-Eastern Hill University, NEHU Campus, Shillong - 793022, India.

(E-mail: [dey.johar@gmail.com](mailto:dey.johar@gmail.com); [jahardey@kaist.ac.kr](mailto:jahardey@kaist.ac.kr).)

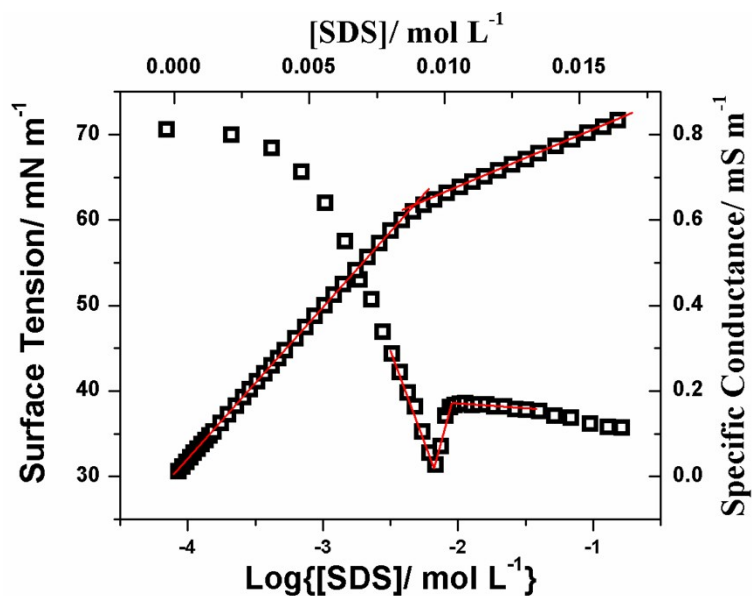

**Fig. S1.** Plots of variation of  $\gamma$  and specific conductance of SDS in water at 25 °C.

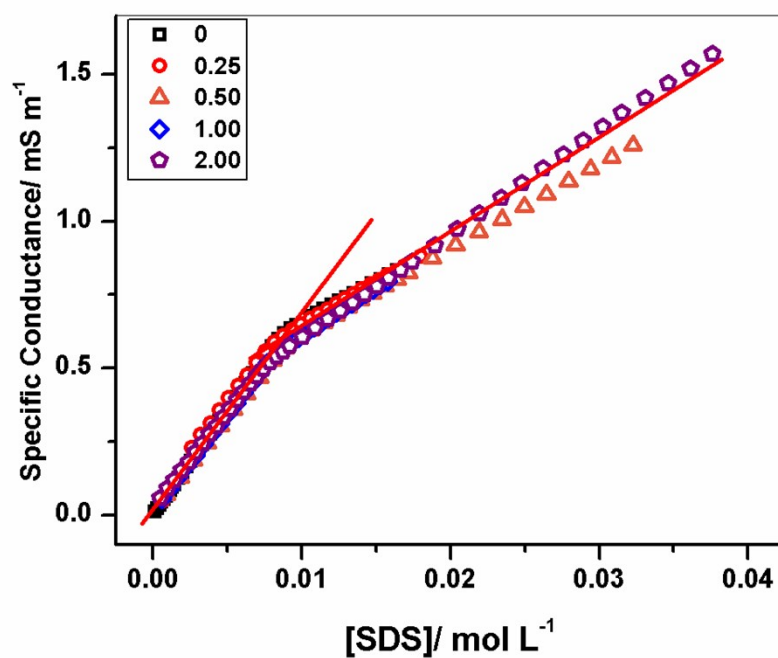

**Fig. S2.** Variation of specific conductance of SDS with SDS concentration at 25 °C in the presence of PEG-400. Each plot corresponds to a particular composition of PEG-400 (w/w) as indicated in the insets.

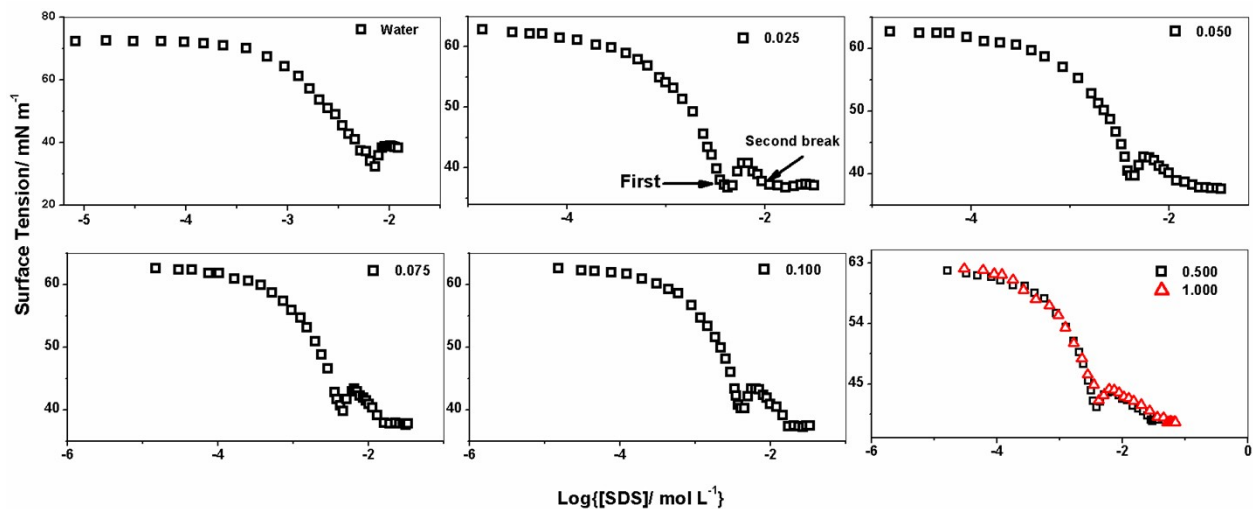

**Fig. S3.** Plots of variation of  $\gamma$  of SDS in PEG-10000 at 25 °C. The concentrations of PEG as wt % are shown in the inset.

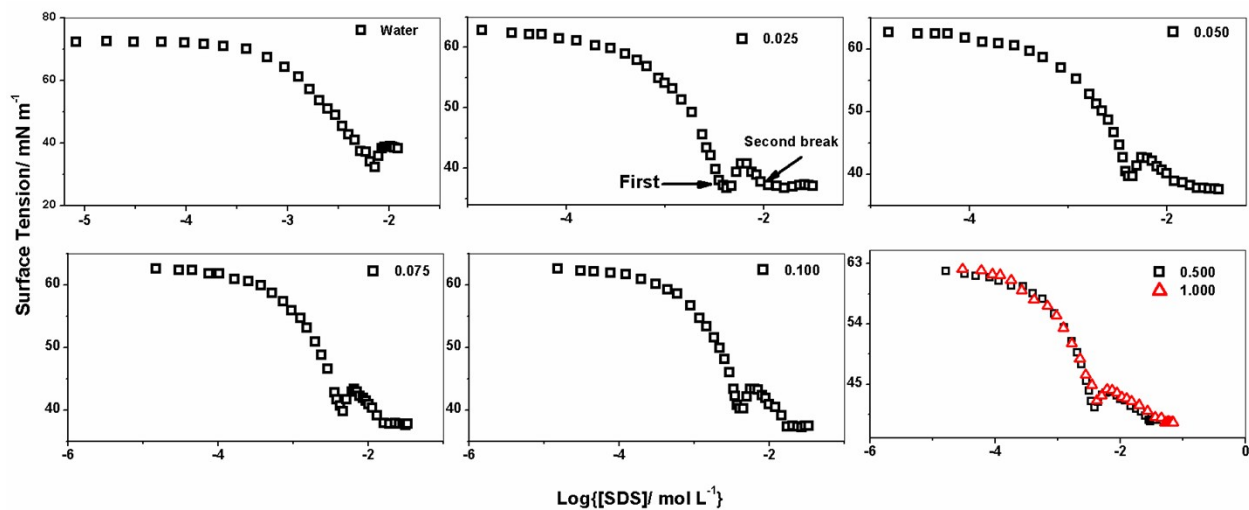

**Fig. S4.** Plots of variation of  $\gamma$  of SDS in PEG-20000 at 25 °C. The concentrations of PEG as wt % are shown in the inset.

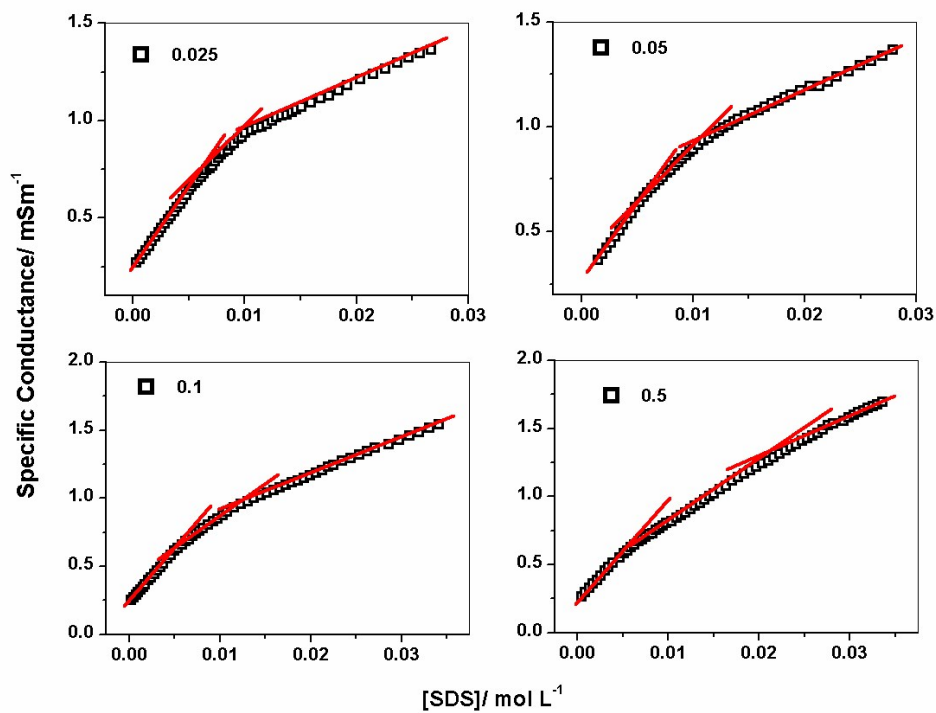

**Fig. S5.** Variation of specific conductance of SDS in varying amounts of PEG-20000 with SDS concentration at 25 °C. Each plot corresponds to a particular composition of PEG-20000 (w/w %) as indicated in the insets.

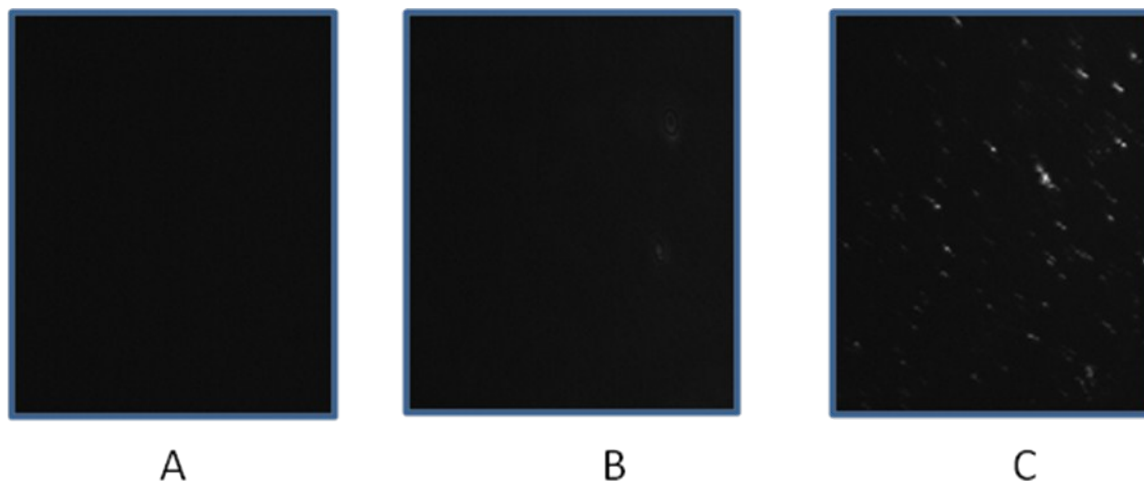

**Fig. S6.** BAM images of SDS in 0.05 % PEG-10000. (A) 0.05 % PEG-10000 (B) SDS (0.001 mol L<sup>-1</sup>) + 0.05% PEG-10000 and (C) SDS (0.0075 mol L<sup>-1</sup>) + 0.05% PEG-10000.

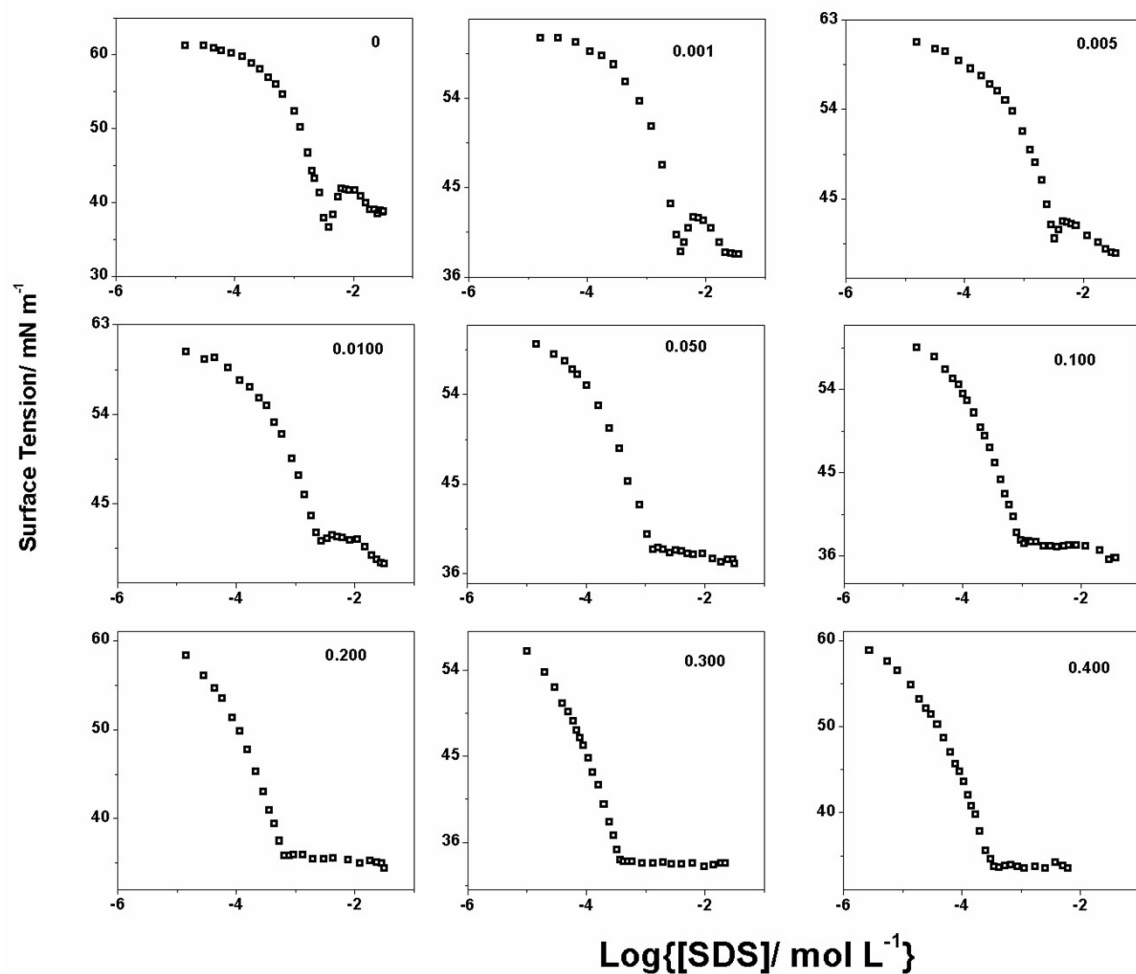

**Fig. S7.** Plots of variation of  $\gamma$  of SDS in PEG-20000 at 25 °C as a function of [NaCl]. The concentration of PEG-20000 is 0.5 % w/w and the [NaCl] are shown in the inset.

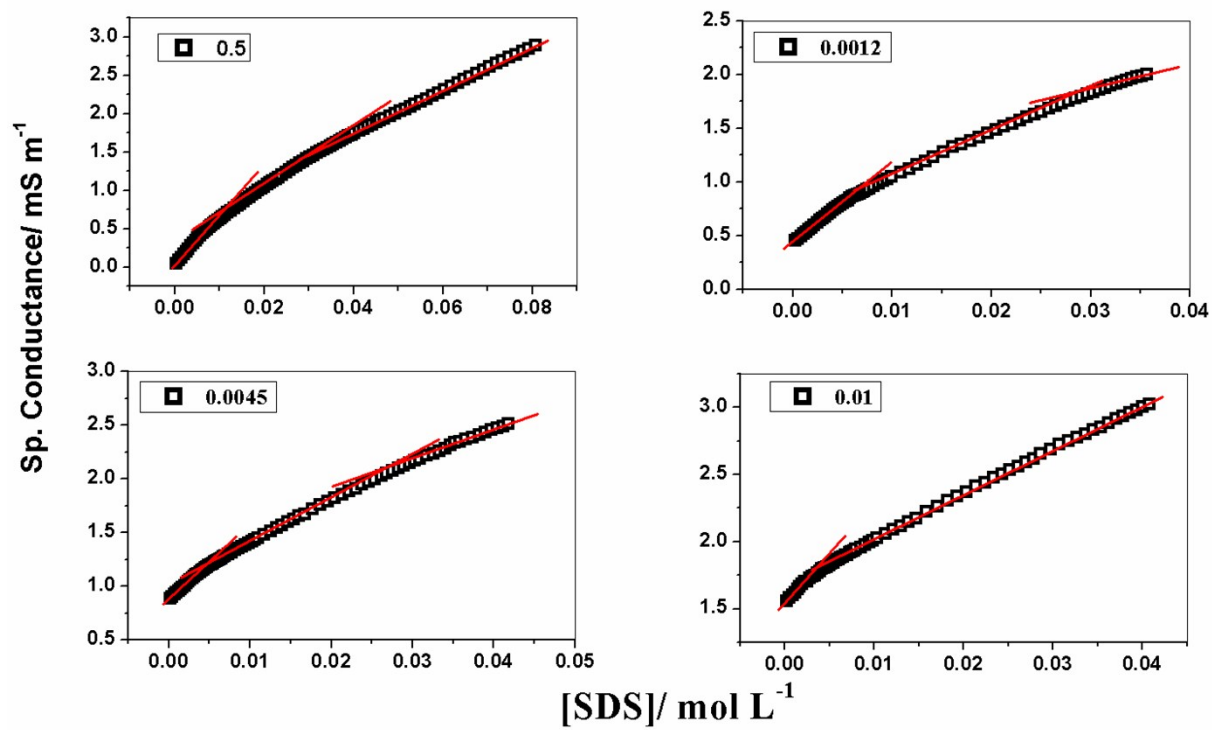

**Fig. S8.** Variation of specific conductance of SDS in 0.5 % w/w of PEG-6000 containing varying amounts of NaCl at 25 °C. Each plot corresponds to a particular [NaCl] as indicated in the insets.

**Table S1.** Critical micelle concentrations (cmc) of SDS in varying amounts of PEG-400

| <b>PEG-400 ( % w/w)</b> | <b>cmc <math>\pm</math> 0.0002 / mol L<sup>-1</sup> (from S. T.)</b> | <b>cmc <math>\pm</math> 0.0002 / mol L<sup>-1</sup> (from Cond.)</b> |
|-------------------------|----------------------------------------------------------------------|----------------------------------------------------------------------|
| 0                       | 0.0086                                                               | 0.0088                                                               |
| 0.25                    | 0.0087                                                               | 0.0084                                                               |
| 0.50                    | 0.0087                                                               | 0.0084                                                               |
| 1.00                    | 0.0097                                                               | 0.0090                                                               |
| 2.00                    | 0.0100                                                               | 0.0092                                                               |

**Table S2.** Values of CAC and CMC for SDS in varying amounts of PEG-6000 obtained from surface tension and conductance measurements.

| <b>[PEG] / % w/w</b> | <b>cac <math>\pm</math> 0.0002 / mol L<sup>-1</sup></b> |                   | <b>cmc <math>\pm</math> 0.0002 / mol L<sup>-1</sup></b> |                   |
|----------------------|---------------------------------------------------------|-------------------|---------------------------------------------------------|-------------------|
|                      | <b>From S.T.</b>                                        | <b>From Cond.</b> | <b>From S.T.</b>                                        | <b>From Cond.</b> |
| 0.025                | 0.0050                                                  | 0.0062            | 0.0096                                                  | 0.0100            |
| 0.050                | 0.0051                                                  | 0.0063            | 0.0155                                                  | 0.0120            |
| 0.075                | 0.0048                                                  | 0.0063            | 0.0190                                                  | 0.0130            |
| 0.100                | 0.0040                                                  | 0.0056            | 0.0198                                                  | 0.0152            |
| 0.500                | 0.0047                                                  | 0.0068            | 0.0600                                                  | -                 |

**Table S3.** Values of CAC and CMC for SDS in varying amounts of PEG-10000 obtained from surface tension.

| [PEG] / % w/w | <b>cac</b> $\pm$ 0.0002 / mol L <sup>-1</sup> | <b>cmc</b> $\pm$ 0.0002 / mol L <sup>-1</sup> |
|---------------|-----------------------------------------------|-----------------------------------------------|
| 0.025         | 0.0043                                        | 0.0103                                        |
| 0.050         | 0.0043                                        | 0.0133                                        |
| 0.075         | 0.0045                                        | 0.0157                                        |
| 0.100         | 0.0041                                        | 0.0173                                        |
| 0.500         | 0.0038                                        | 0.0299                                        |
| 1.000         | 0.0041                                        | 0.0516                                        |

**Table S4.** Values of CAC and CMC for SDS in varying amounts of PEG-20000 obtained from surface tension and conductance measurements.

| [PEG] / % w/w | <b>cac</b> $\pm$ 0.0002 / mol L <sup>-1</sup> |                   | <b>cmc</b> $\pm$ 0.0002 / mol L <sup>-1</sup> |                   |
|---------------|-----------------------------------------------|-------------------|-----------------------------------------------|-------------------|
|               | <b>From S.T.</b>                              | <b>From Cond.</b> | <b>From S.T.</b>                              | <b>From Cond.</b> |
| 0.025         | 0.0042                                        | 0.0062            | 0.0105                                        | 0.0100            |
| 0.050         | 0.0043                                        | 0.0058            | 0.0130                                        | 0.013             |
| 0.075         | 0.0037                                        | —                 | 0.0144                                        | —                 |
| 0.100         | 0.0038                                        | 0.0060            | 0.0170                                        | 0.0145            |
| 0.500         | 0.0039                                        | 0.0065            | 0.0201                                        | 0.0200            |
| 1.000         | 0.0023                                        | —                 | 0.0249                                        | —                 |



**Table S5.** Values of CAC and CMC for SDS in 0.5 % w/w of PEG-6000 containing varying amounts of NaCl obtained from surface tension and conductance measurements.

| [NaCl] / mol L <sup>-1</sup> | cac ± 0.0002 / mol L <sup>-1</sup> |            | cmc ± 0.0002 / mol L <sup>-1</sup> |            |
|------------------------------|------------------------------------|------------|------------------------------------|------------|
|                              | From S.T.                          | From Cond. | From S.T.                          | From Cond. |
| 0                            | 0.0047                             | 0.0068     | 0.0340                             | 0.0300     |
| 0.0012                       | 0.0055                             | 0.0054     | 0.0270                             | 0.0240     |
| 0.0050                       | 0.0062                             | 0.0058     | 0.0230                             | 0.0220     |
| 0.0100                       | 0.0043                             | –          | 0.0184                             | 0.0300     |
| 0.0500                       | 0.0035                             | –          | 0.0135                             | –          |
| 0.1000                       | –                                  | –          | 0.0010                             | –          |
| 0.3000                       | –                                  | –          | 0.0005                             | –          |
| 0.5000                       | –                                  | –          | 0.0003                             | –          |

**Table S6.** Values of CAC and CMC for SDS in 0.5 % w/w of PEG-20000 containing varying amounts of NaCl obtained from surface tension and conductance measurements.

| [NaCl] / mol L <sup>-1</sup> | cac ± 0.0002 / mol L <sup>-1</sup> |            | cmc ± 0.0002 / mol L <sup>-1</sup> |            |
|------------------------------|------------------------------------|------------|------------------------------------|------------|
|                              | From S.T.                          | From Cond. | From S.T.                          | From Cond. |
| 0                            | 0.0063                             | 0.0065     | 0.0190                             | 0.0200     |
| 0.0010                       | 0.0061                             | –          | 0.0200                             | –          |
| 0.0050                       | 0.0045                             | –          | 0.0270                             | –          |
| 0.0100                       | –                                  | –          | 0.0250                             | –          |
| 0.0500                       | –                                  | –          | 0.0134                             | –          |
| 0.1000                       | –                                  | –          | 0.0009                             | –          |
| 0.2000                       | –                                  | –          | 0.0006                             | –          |
| 0.3000                       | –                                  | –          | 0.0003                             | –          |
| 0.4000                       | –                                  | –          | 0.0003                             | –          |
